# Supplementary material for: DNA/Protein Binding and Apoptotic-Induced Anticancer Property of a First Time Reported Quercetin–Iron(III) Complex Having a Secondary Anionic Residue: A Combined Experimental and Theoretical Approach
Source: PubMed Central journal article supplement — ACS Omega. 2022 Dec 20;8(1):636–47. doi: 10.1021/acsomega.2c05790 (PMC9835804; doi:10.1021/acsomega.2c05790), 2022-12-20
Supplement: ao2c05790_si_001.pdf [file ao2c05790_si_001.pdf]

# **DNA / Protein Binding and Apoptotic induced Anti-cancer property of First Time Reported Quercetin – Iron (III) Complex Having Secondary Anionic Residue: A combine Experimental and Theoretical Approach**

Manjushree Bera,<sup>a</sup> Manik Das,<sup>b</sup> Malay Dolai<sup>b</sup>, Soumik Laha,<sup>c</sup> Md. Maidul Islam,<sup>d</sup> Bidhan Chandra Samanta,<sup>e</sup> Arindam Das,<sup>f</sup> Indranil Choudhuri<sup>g</sup>, Nandan Bhattacharyya<sup>g</sup>, Tithi Maity\*<sup>b</sup>

<sup>a</sup>Department of Nutrition, Prabhat Kumar College, Contai, Contai, Purba Medinipur, India, 721404

<sup>b</sup> Department of Chemistry, Prabhat Kumar College, Contai, Contai, Purba Medinipur, India, 721404

<sup>c</sup>3 IICB, Kolkata, West Bengal, India

<sup>d</sup>Department of Chemistry, Aliah University, Kolkata, India

<sup>e</sup>Department of Chemistry, Mugberia Gangadhar Mahavidyalaya, Purba Medinipur, India

<sup>f</sup> Department of Chemistry, Jadavpur University, Kolkata, India

<sup>g</sup> Panskura Banamali College, Panskura, West Bengal India

**Email:** [titlipkc2008@gmail.com](mailto:titlipkc2008@gmail.com)

| <b>Sl No.</b> | <b>Index</b>                                                                                            | <b>Page No.</b> |
|---------------|---------------------------------------------------------------------------------------------------------|-----------------|
| <b>1.</b>     | <b>Figure S1:</b> IR spectra of a) Quercetin and b) Complex 1                                           | <b>S3</b>       |
| <b>2.</b>     | <b>Figure S2:</b> UV spectrum of Quercetin and complex 1                                                | <b>S4</b>       |
| <b>3.</b>     | <b>Figure S3:</b> Mass spectra of complex 1                                                             | <b>S5</b>       |
| <b>4.</b>     | <b>Figure S4:</b> Electron paramagnetic resonance (EPR) spectroscopy of Complex 1                       | <b>S6</b>       |
| <b>5.</b>     | <b>Figure S5:</b> Frontier molecular orbitals involved in the absorbance of complex 1 in DMSO solution  | <b>S7</b>       |
| <b>7.</b>     | <b>Table S1:</b> Selective bond distances and bond angles of 1.                                         | <b>S7</b>       |
| <b>7.</b>     | <b>Figure S6:</b> At CP buffer at pH 7.4 the stability curve of complex 1 as a function of time         | <b>S8</b>       |
| <b>8.</b>     | <b>Figure S7:</b> Job's plot by using fluorescence quenching of the HSA by complex 1                    | <b>S8</b>       |
| <b>10.</b>    | <b>Table S2:</b> Fluorescence Lifetime decay parameters of HSA in the absence and presence of Complex 1 | <b>S9</b>       |
| <b>11</b>     | <b>Table S3:</b> Statistical data analysis in 48 hrs incubation                                         | <b>S9</b>       |

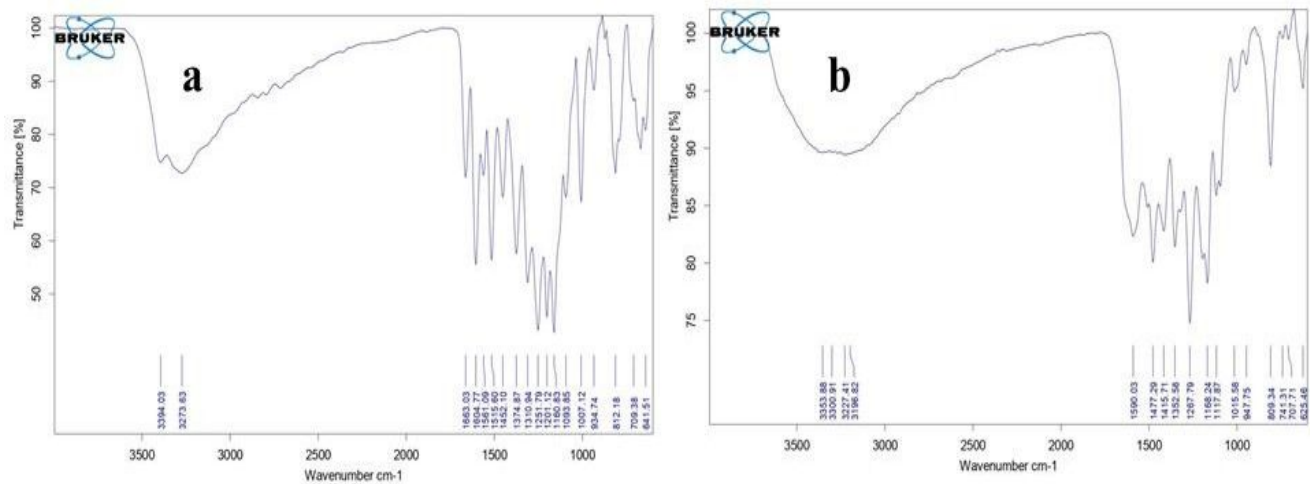

**Figure S1:** IR spectra of a) Quercetin and b) Complex 1

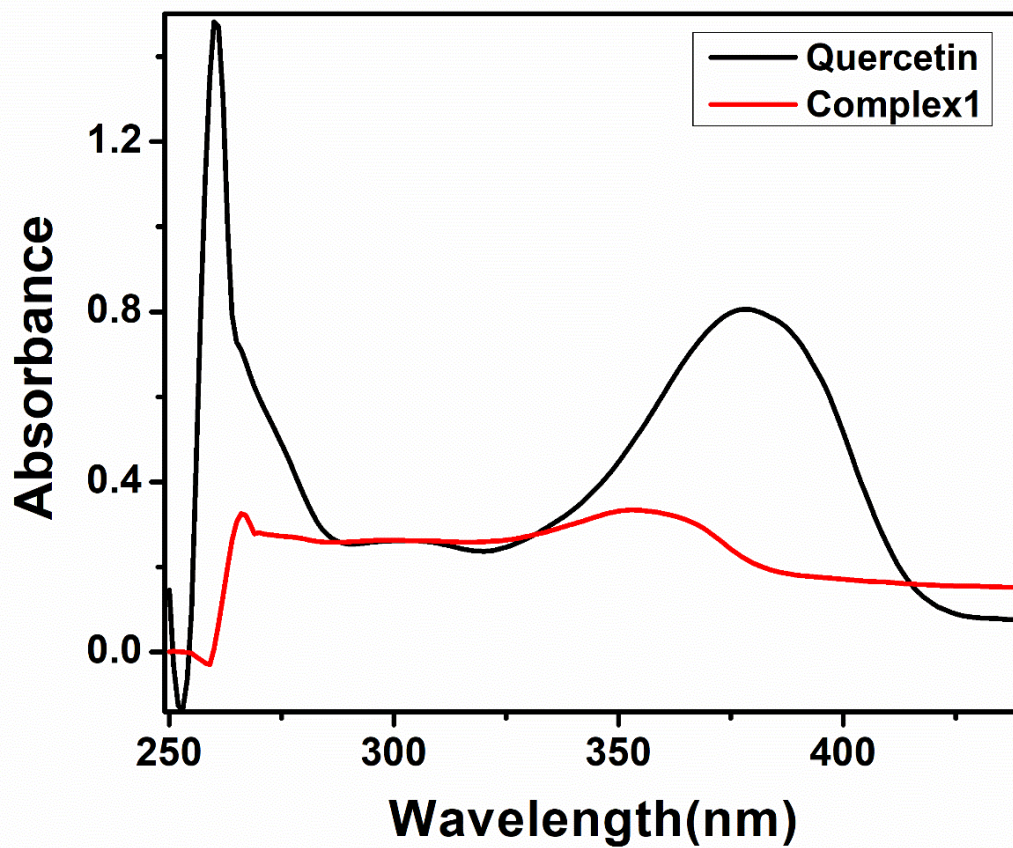

**Figure S2:** UV spectrum of Quercetin and complex 1

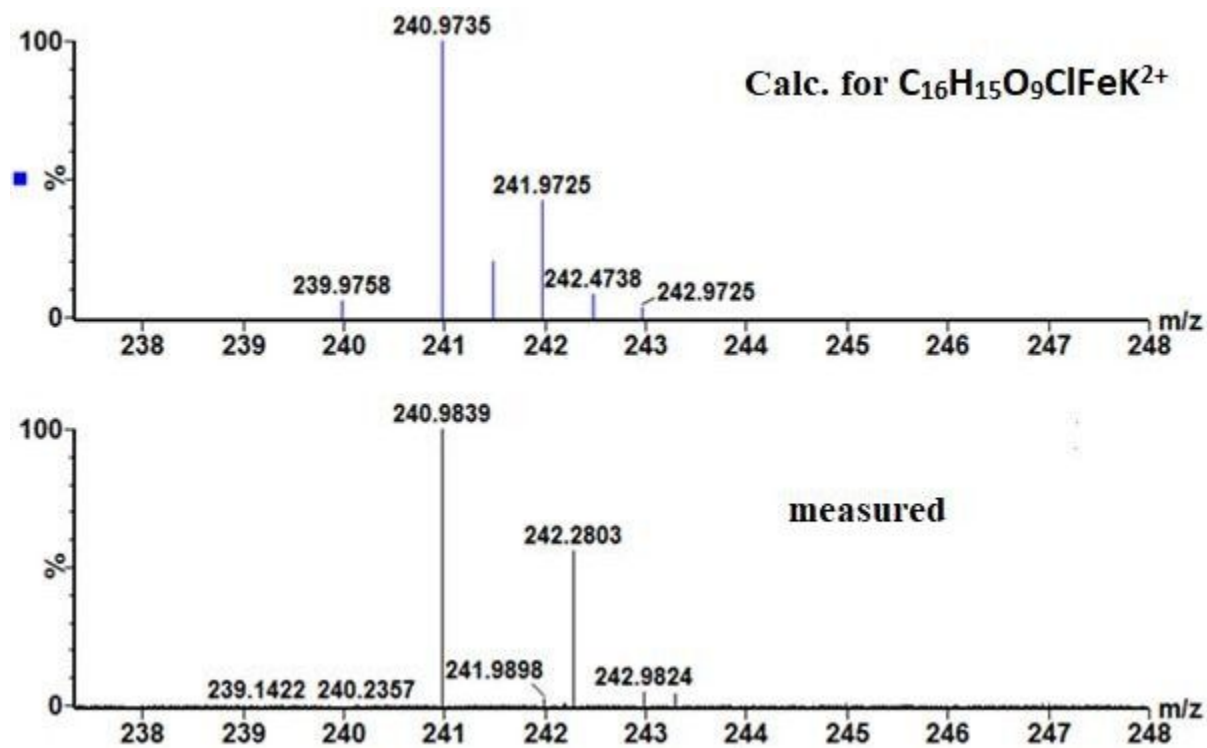

Figure S3: Mass spectra of complex 1

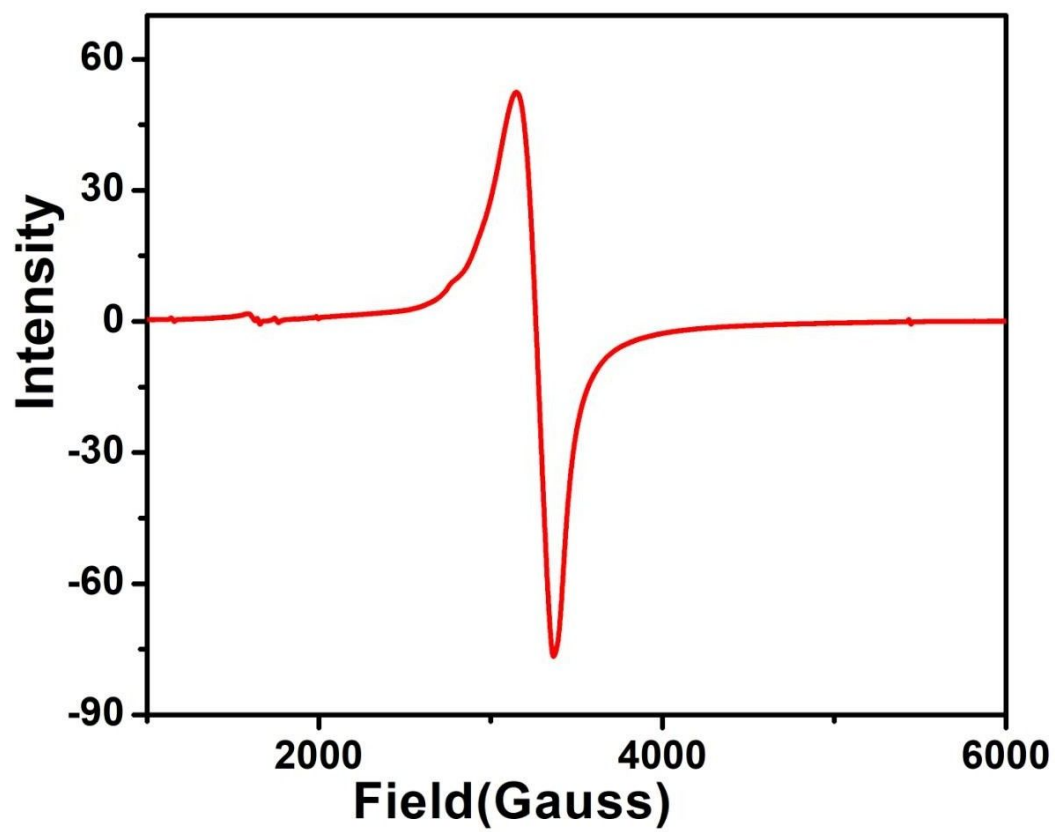

**Figure S4:** Electron paramagnetic resonance (EPR) spectroscopy of Complex 1

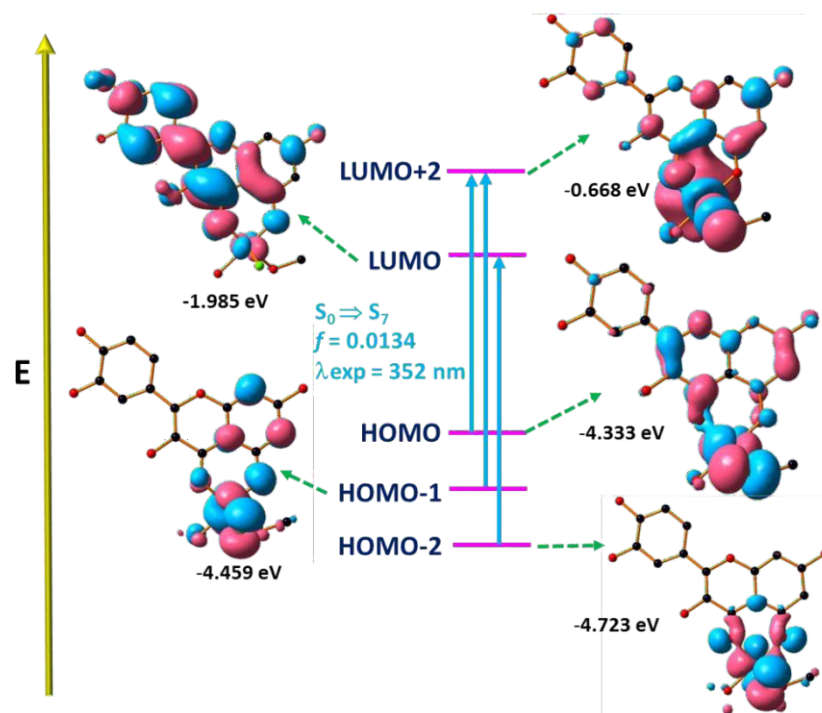

**Figure S5:** Frontier molecular orbitals involved in the absorbance of complex **1** in DMSO solution

**Table S1:** Selective bond distances and bond angles of **1**.

| Bond distance(Å) |       | Bond angles (°) |        |
|------------------|-------|-----------------|--------|
| Fe1-Cl1          | 2.337 | Cl1- Fe1-O1     | 106.50 |
| Fe1-O1           | 1.875 | Cl1- Fe1-O2     | 93.80  |
| Fe1-O2           | 1.902 | O1- Fe1-O2      | 93.59  |
| Fe1-O1W          | 2.008 | O1- Fe1-O1M     | 161.27 |
| Fe1-O1M          | 2.020 | O1- Fe1-O1W     | 86.52  |
|                  |       | O2- Fe1-O1M     | 86.31  |
|                  |       | O2- Fe1-O1W     | 179.87 |
|                  |       | Cl1- Fe1-O1W    | 86.21  |
|                  |       | Cl1- Fe1-O1M    | 92.17  |



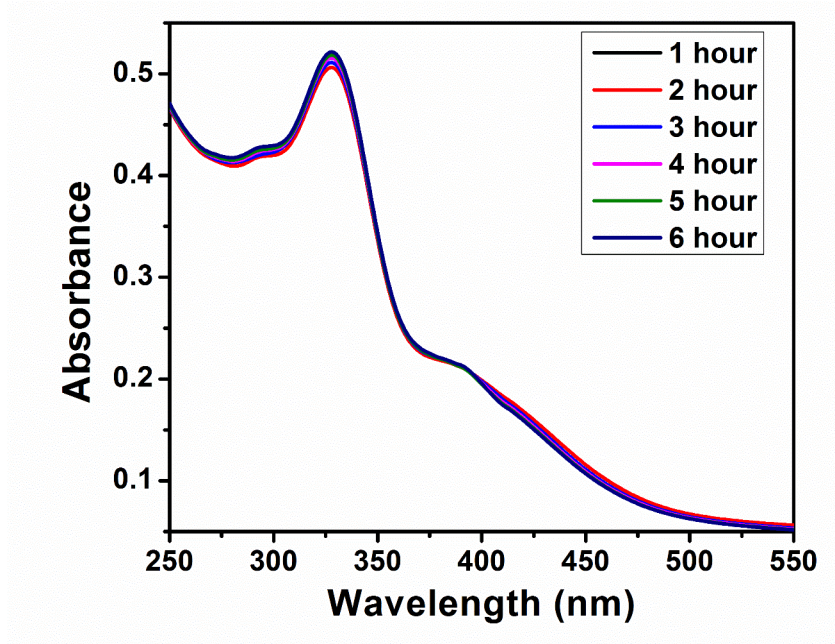

**Figure S6:** At CP buffer at pH 7.4 the stability curve of complex **1** as a function of time

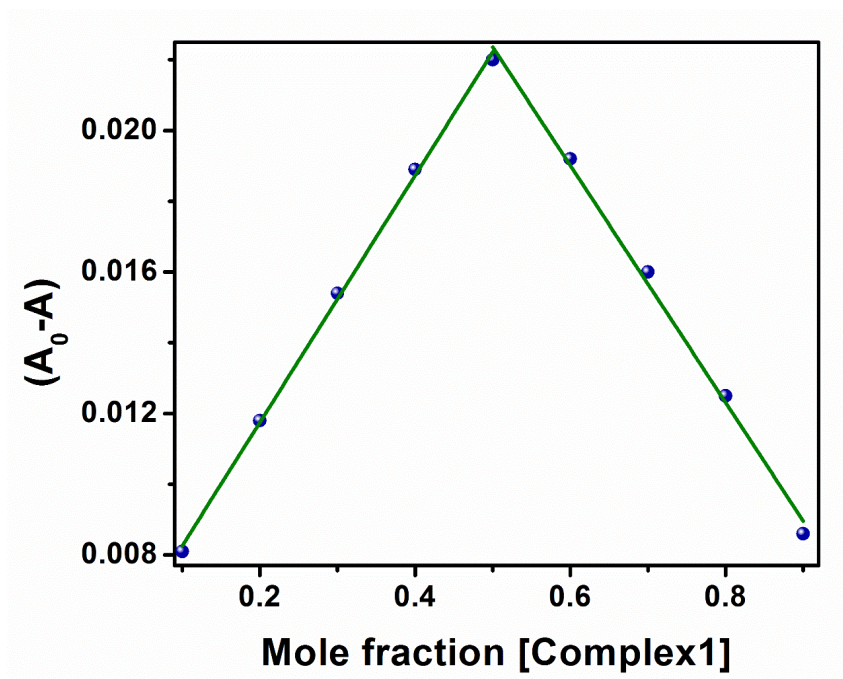

**Figure S7:** Job's plot by using fluorescence quenching of the HSA by complex **1**



**Table S2:** Fluorescence Lifetime decay parameters of HSA in the absence and presence of Complex 1

| Sample           | $\alpha_1$ | $\tau_1$ (ns) | $\alpha_2$ | $\tau_2$ (ns) | $\tau_{av}$ (ns) | $\chi^2$ |
|------------------|------------|---------------|------------|---------------|------------------|----------|
| HSA              | 0.80       | 0.61          | 0.20       | 5.21          | 3.74             | 1.60     |
| HSA + Complex1_a | 0.85       | 0.50          | 0.15       | 4.76          | 3.18             | 1.64     |
| HSA + Complex1_b | 0.88       | 0.43          | 0.12       | 4.14          | 2.54             | 1.62     |
| HSA + Complex1_c | 0.90       | 0.38          | 0.10       | 3.86          | 2.22             | 1.65     |

**Table S3:** Statistical data analysis in 48 hrs incubation

| Dose ( $\mu$ M) | Survival (%) |              |              |              |              |              | AVG          | SD           | P           |
|-----------------|--------------|--------------|--------------|--------------|--------------|--------------|--------------|--------------|-------------|
|                 | repeat 1     |              | repeat 2     |              | repeat 3     |              |              |              |             |
| 0               | 100          | 100          | 100          | 100          | 100          | 100          | 100          | 0            | -           |
| 1.25            | 35.434<br>08 | 38.342<br>85 | 41.516<br>05 | 40.987<br>18 | 42.838<br>22 | 58.439<br>79 | 42.926<br>36 | 8.0444<br>58 | 0.0003      |
| 2.5             | 18.774<br>77 | 13.750<br>54 | 18.774<br>77 | 15.072<br>71 | 14.808<br>27 | 19.568<br>07 | 16.791<br>52 | 2.5183<br>73 | 0.0001      |
| 5               | 9.7840<br>37 | 10.841<br>77 | 11.106<br>2  | 12.692<br>81 | 12.163<br>94 | 15.072<br>71 | 11.943<br>58 | 1.8428<br>31 | <0.00<br>01 |

|    |              |              |              |              |              |              |              |              |             |
|----|--------------|--------------|--------------|--------------|--------------|--------------|--------------|--------------|-------------|
| 10 | 8.7263<br>03 | 5.0242<br>35 | 6.3464<br>03 | 8.1974<br>37 | 6.6108<br>36 | 12.957<br>24 | 7.9770<br>75 | 2.7805<br>36 | <0.00<br>01 |
| 20 | 8.7263<br>03 | 6.3464<br>03 | 8.9907<br>37 | 6.6108<br>36 | 5.2886<br>69 | 11.899<br>5  | 7.9770<br>75 | 2.3969<br>79 | <0.00<br>01 |
